# Supplementary material for: The Expression and Function of Notch Involved in Ovarian Development and Fecundity in Basilepta melanopus
Source: MDPI journal article supplement (doi:10.3390/insects15040292), 2024-04-19
Supplement: s1 [file s1]

## Supplementary Materials

The following supporting information can be downloaded at:

Table S1. List of primers used for qPCR and dsNotch synthesis.;

| Primer             | Sequence (5'-3')                                 |
|--------------------|--------------------------------------------------|
| Notch-01F          | GTGTCGGCAAATGGAGAA                               |
| Notch-01R          | GACTGGTGTCTCGCAAATCG                             |
| EGFP-S2F           | TGCCCATCCTGGTCGAGCT                              |
| EGFP-S2R           | TGCTTGTCGGCCATGATAT                              |
| T7-01 F            | GGATCCTAATACGACTCACTATAGGGTGTCTGGCAAATGG<br>AGAA |
| T7-01 R            | GGATCCTAATACGACTCACTATAGGGACTGGTGTCTGCAA<br>ATCG |
| T7-EGFP-S2F        | GGATCCTAATACGACTCACTATAGGTGCCCATCCTGGTC<br>GAGCT |
| T7-EGFP-S2R        | GGATCCTAATACGACTCACTATAGGTGCTTGTCGGCCAT<br>GATAT |
| Notch-Q1F          | AAACCTACCAAGTCCCTA                               |
| Notch-Q1R          | CCATCTAAAGTAAACCCTAA                             |
| $\beta$ -actin-Q1F | CGCTTCTGGTCGTACAACCTG                            |
| $\beta$ -actin-Q1R | TGGTGAATGAGTAGCCACGT                             |

Table S2: Information for specimens used in the phylogenetic analysis.

| Order       | Species                                       | GenBank ID     |
|-------------|-----------------------------------------------|----------------|
| Coleoptera  | <i>Diabrotica virgifera virgifera</i>         | XP_028149569.1 |
|             | <i>Anoplophora glabripennis</i>               | XP_018574509.1 |
|             | <i>Leptinotarsa decemlineata</i>              | XP_023013802.1 |
|             | <i>Psylliodes chrysocephala</i>               | CAH1109257.1   |
|             | <i>Tenebrio molitor</i>                       | CAH1379345.1   |
|             | <i>Tribolium castaneum</i>                    | XP_008200304.1 |
|             | <i>Drosophila melanogaster</i>                | NP_001245510.1 |
|             | <i>Aedes aegypti</i>                          | EAT37841.1     |
| Diptera     | <i>Toxorhynchites rutilus septentrionalis</i> | XP_055615510   |
|             | <i>Malaya genurostris</i>                     | XP_058444774.1 |
|             | <i>Bactrocera tryoni</i>                      | XP_039958472.1 |
|             | <i>Schistocerca gregaria</i>                  | XP_049844801.1 |
| Orthoptera  | <i>Locusta migratoria migratoria</i>          | AXY96273.1     |
|             | <i>Gryllus bimaculatus</i>                    | GLG99742.1     |
|             | <i>Schistocerca cancellata</i>                | XP_049784050.1 |
|             | <i>Helicoverpa zea</i>                        | XP_047028405.1 |
|             | <i>Spodoptera frugiperda</i>                  | XP_050553762.1 |
|             | <i>Bombyx mori</i>                            | NP_001157370.1 |
| Lepidoptera | <i>Pararge aegeria</i>                        | XP_039765579.1 |
|             | <i>Arctia plantaginis</i>                     | CAB3259242.1   |
|             | <i>Chilo suppressalis</i>                     | CAH0691090.1   |
|             | <i>Tuta absoluta</i>                          | KAJ2946674.1   |
|             | <i>Athalia rosae</i>                          | XP_012252830.2 |
|             | <i>Colletes gigas</i>                         | XP_043254354.1 |
|             | <i>Polistes dominula</i>                      | XP_015172000.1 |
| Hymenoptera | <i>Vespa velutina</i>                         | XP_047357738.1 |
|             | <i>Osmia bicornis</i>                         | XP_029033765.1 |
|             | <i>Megachile rotundata</i>                    | XP_012145055.1 |
|             | <i>Cataglyphis hispanica</i>                  | XP_050453731.1 |
